# Supplementary material for: Positioning of the HKUST-1 metal–organic framework (Cu3(BTC)2) through conversion from insoluble Cu-based precursors
Source: Royal Society of Chemistry journal article supplement (doi:10.1039/c4qi00215f), 2015-01-01
Supplement: c4qi00215f1.pdf [file c4qi00215f1.pdf]

## SUPPORTING INFORMATION

# Positioning of the HKUST-1 metal–organic framework ( $\text{Cu}_3(\text{BTC})_2$ ) through conversion from insoluble Cu-based precursors

Takashi Toyao, Kang Liang, Kenji Okada, Raffaele Ricco, Mark J. Styles, Yasuaki Tokudome, Yu

Horiuchi, Anita J. Hill, Masahide Takahashi, Masaya Matsuoka\* and Paolo Falcaro\*

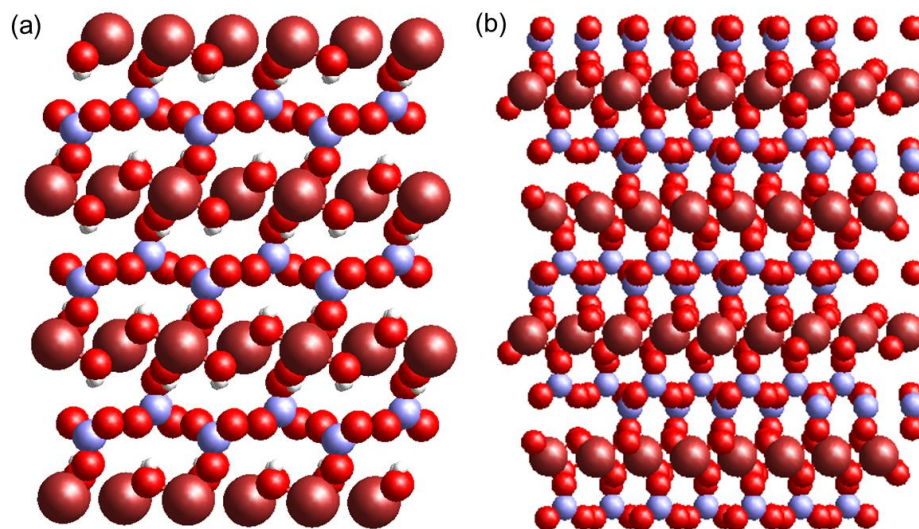

Fig. S1. Crystal structures of the (a) monoclinic Rouaite<sup>S1</sup> and (b) orthorhombic Gerhardtite<sup>S2</sup> polymorphs of  $\text{Cu}_2(\text{OH})_3\text{NO}_3$ . The main difference lies in the packing of the  $\text{NO}_3$  between the Cu layers.

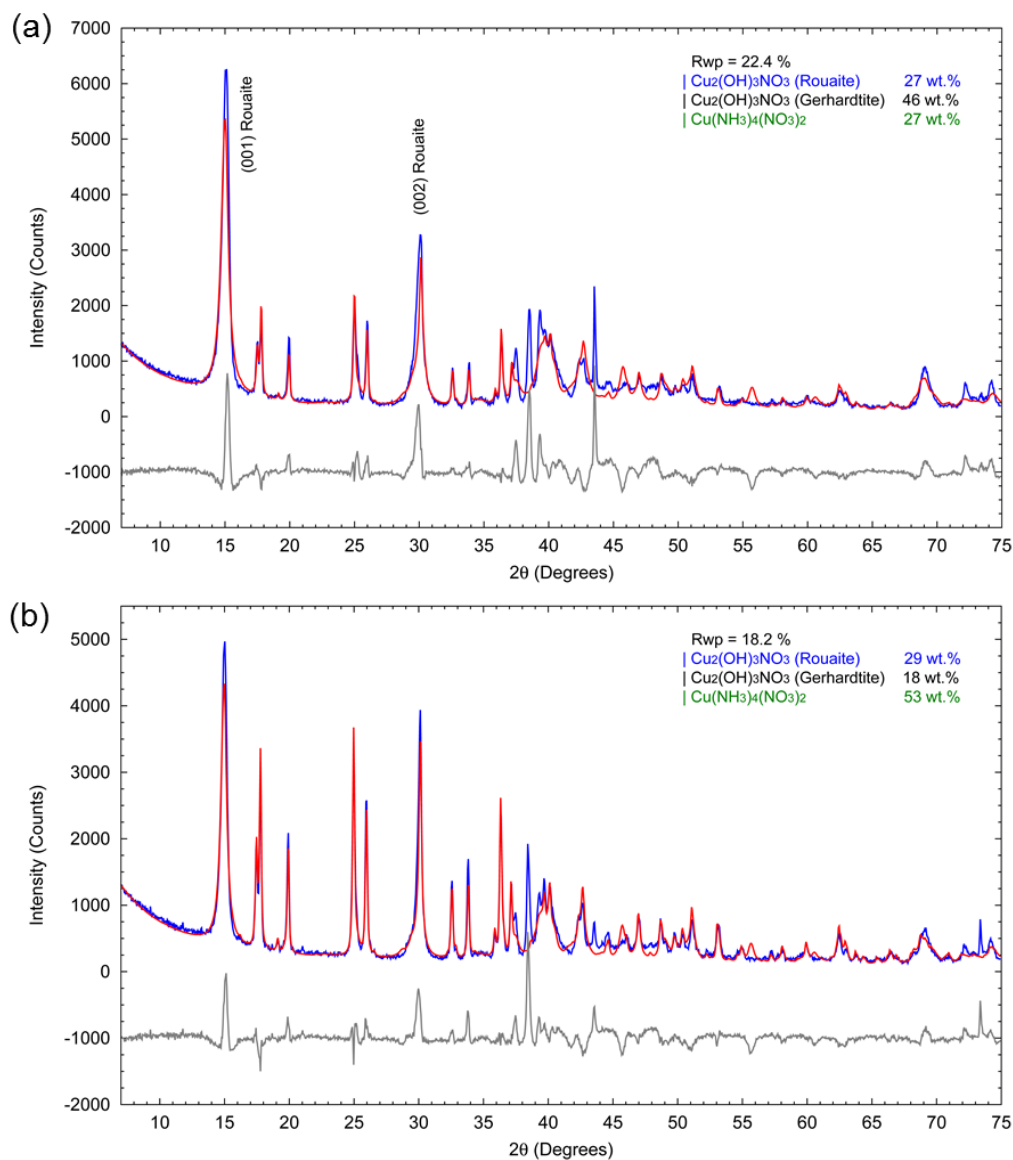

Fig. S2. Observed (blue) and calculated (red) powder diffraction patterns for the Cu-based precursors synthesized using 3 ml (a) and 4 ml (b) of ammonia solution. Difference patterns are shown in grey. The (001) and (002) reflections from the  $\text{Cu}_2(\text{OH})_3\text{NO}_3$  phase (Rouaite), corresponding to the stacking direction of the Cu layers, are shown. These Cu layers are also present in the Gerhardtite polymorph, but with a slightly different arrangement in the  $\text{NO}_3$  packing between layers. Disorder in the way the  $\text{NO}_3$  ions pack between the layers is thought to be responsible for the discrepancies in the relative peak intensities.

## References

- [S1] H. Effenberger, *Zeitschrift fur kristallographie*, 1983, **165**, 127.  
 [S2] B. Bovio and S. Locchi, *J. Crystallogr. Spectrosc. Res.*, 1982, **12**, 507.
